# Supplementary figures and images for: Cisplatin Relocalizes RNA Binding Protein HuR and Enhances the Oncolytic Activity of E4orf6 Deleted Adenovirus
Source: MDPI journal article supplement (doi:10.3390/cancers12040809), 2020-03-27

**Figure 2B ; whole blot with marker**

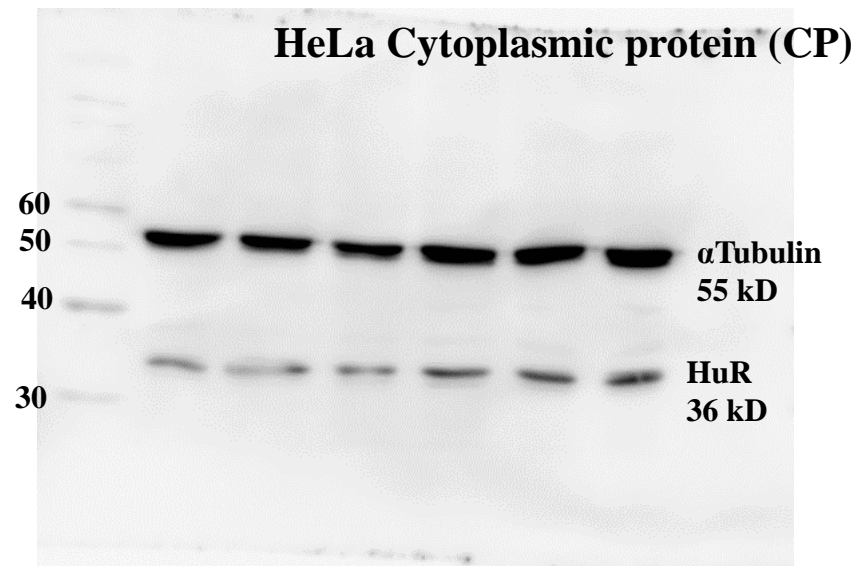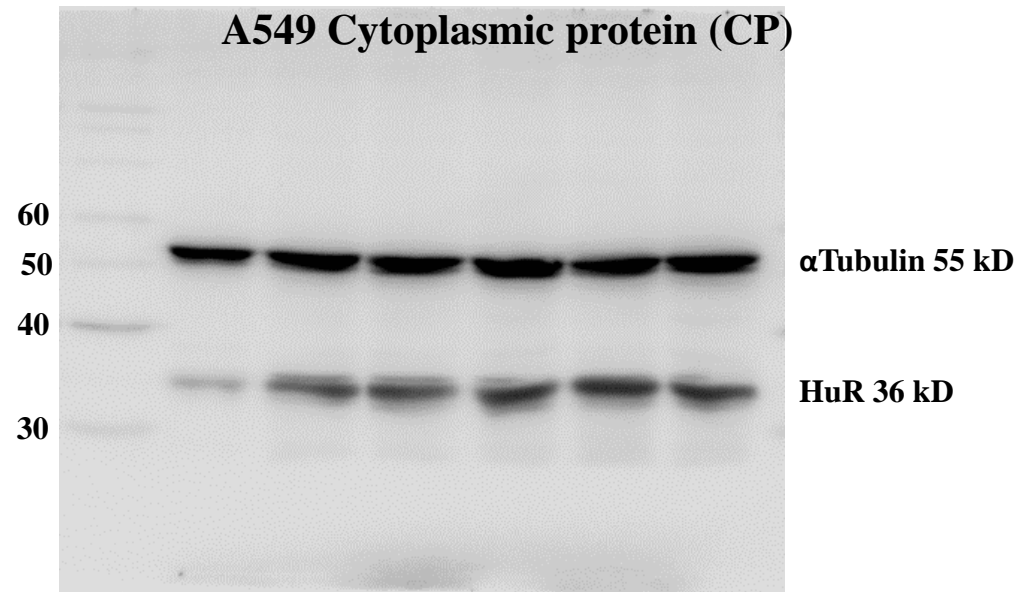

**Figure 4C; whole blot with marker**

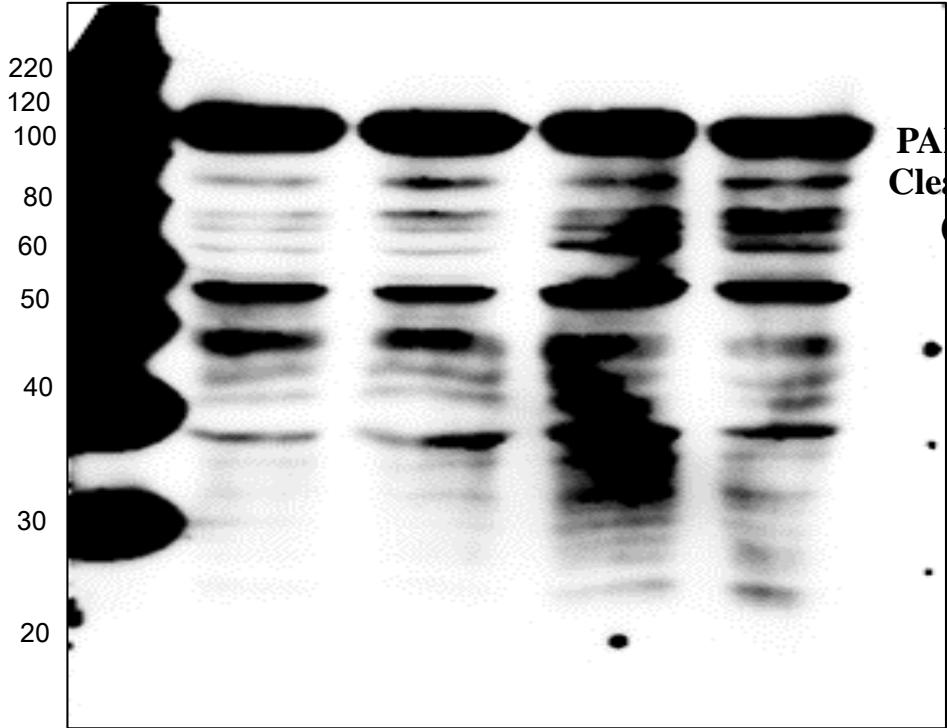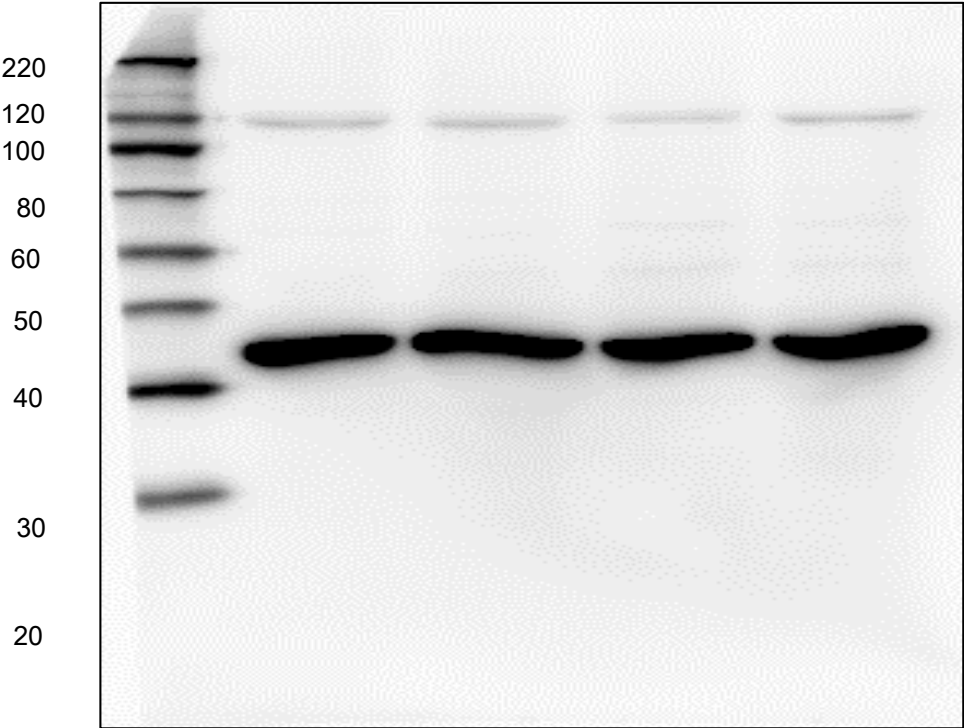

**Figure 4C; whole blot with marker**

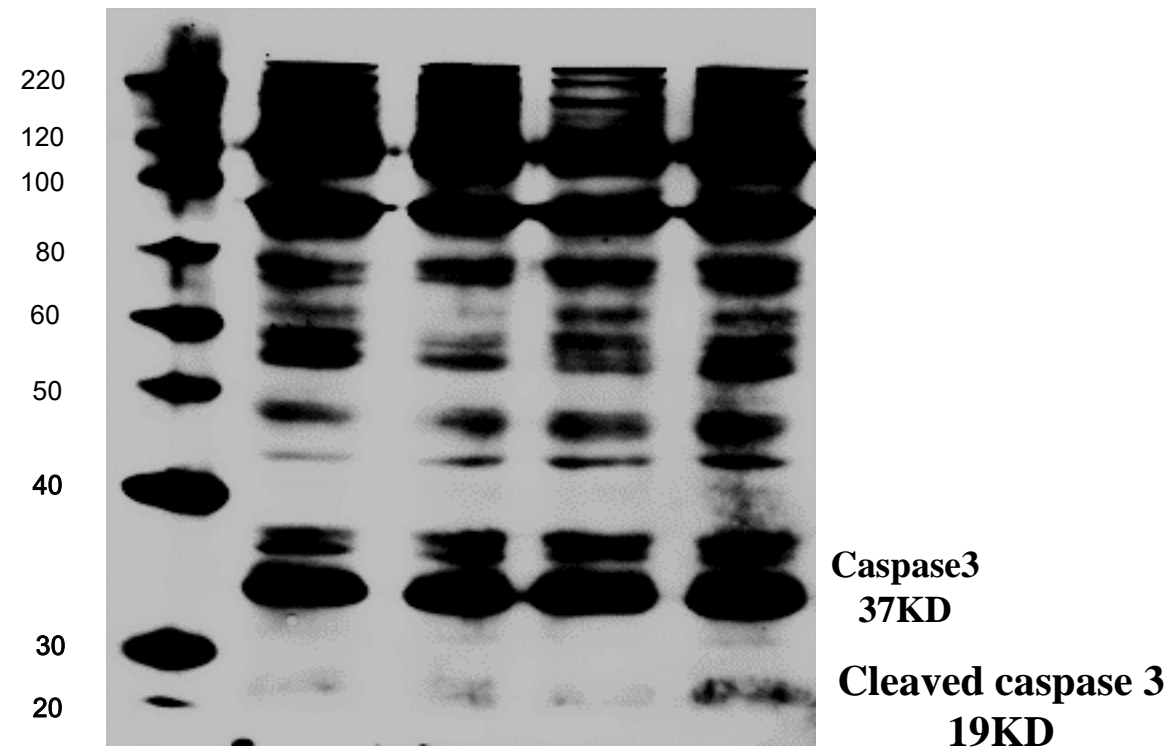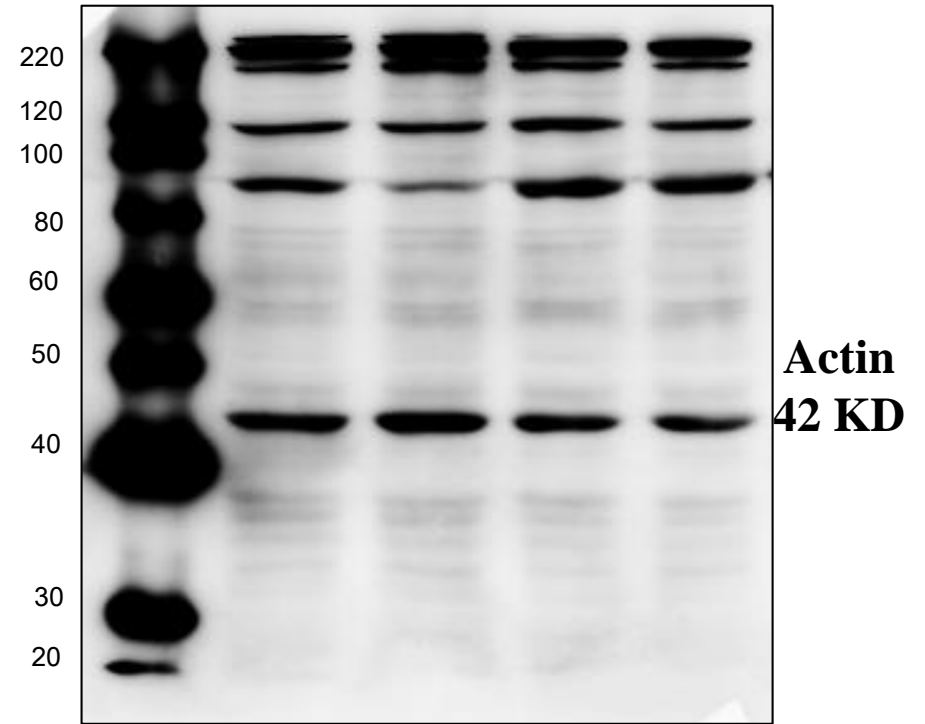

Supplement: s1 [file s1]
